# Supplementary material
Source: publisher site journal article supplement (https://www.dovepress.com/article/411573)
Supplement: Supplementary file 1 [file get_supplementary_file.php]

**Supplementary Table 1. Correlation between variables at baseline and menstrual status of PCOS patients with obesity within 6 months after LSG**

| Items | ρ | P Values |
| --- | --- | --- |
| Age (years) | -0.078 | 0.473 |
| Time from PCOS diagnosis (years) | **-0.309** | **<0.004**** |
| Duration of obesity (years) | **-0.255** | **0.018*** |
| Menstruation number (no./yr) | **0.281** | **0.008**** |
| BMI (kg/m2) | **-0.300** | **0.005**** |
| %TBF | -0.127 | 0.258 |
| VAT Mass (kg) | -0.022 | 0.845 |
| SAT Mass (kg) | -0.106 | 0.353 |
| HOMA-IR | **-0.222** | **0.039*** |
| FBG (mU/L) | -0.101 | 0.350 |
| FINS (mU/L) | -0.179 | 0.097 |
| HbA1c (%) | -0.130 | 0.257 |
| Uric acid (umol/L) | -0.118 | 0.277 |
| Creatinine(umol/L) | -0.146 | 0.178 |
| TC (mmol/L) | -0.195 | 0.071 |
| TG (mmol/L) | -0.087 | 0.425 |
| HDL-c (mmol/L) | -0.180 | 0.096 |
| LDL-c (mmol/L) | -0.054 | 0.621 |
| LH/FSH | 0.027 | 0.809 |
| TT (ng/mL) | **-0.297** | **0.006*** |
| cFT (nmol/L) | -0.304 | 0.054 |
| SHBG (nmol/L) | 0.102 | 0.520 |
| FGL-1 (ng/ml) | -0.112 | 0.485 |

**Abbreviations:** *BMI,* body mass index; *%TBF*, the percentage of total body fat; *VAT*, visceral adipose tissue; *SAT*, abdominal subcutaneous adipose tissue; *HOMA-IR*, homeostatic model assessment insulin resistance index; *FBG*, fasting plasma glucose; *FINS*, fasting serum insulin; *HbA1c*, glycosylated hemoglobin A1c; *TC*, total cholesterol; *TG*, triglycerides;  *HDL-c*, high-density lipoprotein cholesterol; *LDL-c*, low-density lipoprotein cholesterol; *LH*, luteinizing hormone; *FSH*, follicle-stimulating hormone; *TT,* total testosterone; *cFT*, calculated free testosterone; *SHBG*, sex hormone-binding globulin; *FGL-1*, fibrinogen-like protein 1. The bold values indicate statistical significance; ρ means Spearman's correlation coefficient;***** Means *P*<0.05; **means *P*<0.01.
